# Supplementary material
Source: PubMed Central journal article supplement (PMC4223991)
Supplement: age0045-0893-sd2.pdf [file age0045-0893-sd2.pdf]

Table S2: Primers for analysis of *ASIP* in hybrid cats and wild felids.

| Exon | Exon size (bp) | Product size (bp) | Primer sequence 5'→3'                                                                                                 |
|------|----------------|-------------------|-----------------------------------------------------------------------------------------------------------------------|
| 2    | 160            | 462               | F: CCAGCCCAAAGAGATACAAGG<br>R: CTGCTTATTAGACTGGTGGTATGC                                                               |
| 2    | 160            | 237               | F <sup>4</sup> : GAATATCCTCCGCCTACTCCTG<br>R <sup>4</sup> : GGGAGCACGTTTGACATCTT                                      |
| 3    | 62             | 464               | F: CACACCCTGAGATTTCTGG<br>R: GCAATAACAGAGGTCTAGGAAACA                                                                 |
| 4    | 186            | 495               | F <sup>1</sup> : CCAAGGCTGAGGTGAAGAGG<br>R1 <sup>1</sup> : AAGCCCCGCCTCCTGAAA<br>R2 <sup>2</sup> : GAGAGCCCCACCCTACCC |
| 4    | 186            | 280               | F <sup>3</sup> : AGAGTTCCCAAGGCTGAGGT<br>R1 <sup>3</sup> : GCCTTGGAGGTGGGTGA<br>R2 <sup>2,3</sup> : GGCCTGGAGGCGGGTGA |

<sup>1</sup>Primers obtained from previously published study (Eizirik *et al.* 2003). <sup>2</sup>Primer specific for the Asian leopard cat allele. <sup>3</sup>Primers used for sequencing exon 4. <sup>4</sup>Primers used to amplify exon 2 from European samples with unique allele "A2".
