# Supplementary material
Source: PubMed Central journal article supplement (PMC4223991)
Supplement: age0045-0893-sd3.pdf [file age0045-0893-sd3.pdf]

Table S3. Pyrosequencing primers for *ASIP* analysis.

| <i>ASIP</i> Variant | Amplicon  |                                                                                                    |
|---------------------|-----------|----------------------------------------------------------------------------------------------------|
|                     | Size (bp) | Primers                                                                                            |
| Indel and A127G     | 105       | F: Biotin TGAGGAAAAACCCAGAGATGAC<br>R: GGGGTCAAGCTGGGCTACTTA<br>Seq: ATAGAGACAGAAGRGAGATCCAACAT    |
| T142C               | 105       | F: Biotin TGAGGAAAAACCCAGAGATGAC<br>R: GGGGTCAAGCTGGGCTACTTA<br>Seq: GGGCTACTTACCTACWATAGAGACAGAAG |
| G41C                | 62        | F: Biotin TGGCCACCCTGCTGGTCT<br>R: TTCCTCAGGTGCCAGGTGAC<br>Seq: GTAGGCAGTGAGGAGGCACAG              |
