# Supplementary material
Source: PubMed Central journal article supplement (PMC4223991)
Supplement: age0045-0893-sd4.pdf [file age0045-0893-sd4.pdf]

```

+-----+-----+-----+-----+-----+-----+
Domestic (A) L N K K S K K I S R K E A E K K R S
CTGAACAAGAAATCCAAAAAGATCAGCAGAAAAGAGGCGGAAAAGAAGAGATCT
A E Q E I Q K D Q Q K R G G K E E I
Domestic (a) CTGAACAAGAAATCCAAAAAGATCAGCAGAAAAGAGGCGGAAAAGAAGAGATCT
Leopard Cat (APbe) L N K K S K K I S R K E A E K K R S
CTGAACAAGAAATCCAAAAAGATCAGCAGAAAAGAGGCGGAAAAGAAGAGATCT
Serval (ALse) L N K K S K K I S R K E A E K K R S
CTGAACAAGAAATCCAAAAAGATCAGCAGAAAAGAGGCGGAAAAGAAGAGATCT

```

217 270

```

+-----+-----+-----+-----+-----+-----+
Domestic (A) S K K K A S M K N V A Q P R R P R P
TCCAAGAAAAAGGCTTCGATGAAGAATGTTGCTCAGCCTCGGCGGCCCGGCCT
F Q E K G F D E E C C S A S A A P A
Domestic (a) TCCAAGAAAAAGGCTTCGATGAAGAATGTTGCTCAGCCTCGGCGGCCCGGCCT
Leopard Cat (APbe) S K K K A S M K N V A R P R R P R P
TCCAAGAAAAAGGCTTCGATGAAGAACGTTGCTCGGCCTCGGCGGCCCGGCCT
Serval (ALse) S K K K A S M K N V A R P R R P R P
TCCAAGAAAAAGGCTTCGATGAAGAATGTTGCTCGGCCTCGGCGGCCCGGCCT

```

271 324

```

+-----+-----+-----+-----+-----+-----+
Domestic (A) P P P A P C V A T R D S C K P P A P
CCGCCGCCCGCCCCCTGCGTGGCCACTCGTGACAGCTGCAAGCCGCCGGCGCCC
S A A R P L R G H S X
Domestic (a) P P P A P C V A T R G S C K P P A P
CCGCCGCCCGCCCCCTGCGTGGCCACTCGA GCAGCTGCAAGCCGCCGGCGCCC
Leopard Cat P P P A P C V A T R D S C K P P A P
CCGCCGCCCGCCCCCTGCGTGGCCACTCGA GCAGCTGCAAGCCGCCGGCGCCC
Serval (ALse) P P P A P C V A T R D S C K P P A P
CCGCCGCCCGCCCCCTGCGTGGCCACTCGTGACAGCTGCAAGCCGCCGGCGCCC

```

325 378

```

+-----+-----+-----+-----+-----+-----+
Domestic (A) A C C D P C A S C Q C R F F R S S C
GCCTGCTGCGACCCGTGCGCCTCCTGCCAGTGCCGCTTCTTCCGCAGCTCCTGC
Domestic (a) GCCTGCTGCGACCCGTGCGCCTCCTGCCAGTGCCGCTTCTTCCGCAGCTCCTGC
A C C D P C A S C Q C R F F R S S C
Leopard Cat (APbe) GCCTGCTGCGACCCGTGCGCCTCCTGCCAGTGCCGCTTCTTCCGCAGCTCCTGC
A C C D P C A S C Q C R F F R S S C
Serval (ALse) GCCTGCTGCGACCCGTGCGCCTCCTGCCAGTGCCGCTTCTTCCGCAGCTCCTGC
A C C D P C A S C Q C R F F R S S C

```

379 408

```

+-----+-----+-----+
Domestic (A) S C R V L N P T C X
TCCTGCCGAGTGCTCAACCCACCTGCTGA
Domestic (a) TCCTGCCGAGTGCTCAACCCACCTGCTGA
S C R V L N P T C X
Leopard Cat (APbe) TCCTGCCGAGTGCTCAACCCACATGCTGA
S C R V L N P T C X
Serval (ALse) TCCTGCCGAGTGCTCAACCCACCTGCTGA

```
